# Supplementary material for: Population Pharmacokinetic/Pharmacodynamic Modeling of Sunitinib by Dosing Schedule in Patients with Advanced Renal Cell Carcinoma or Gastrointestinal Stromal Tumor
Source: Springer Nature journal article supplement (doi:10.1007/s40262-016-0404-5), 2016-05-06
Supplement: MOESM2 [file 10108364]

## S1 Goodness-of-Fit Diagnostic Plots, Weighted Residuals vs Time (Final Model)

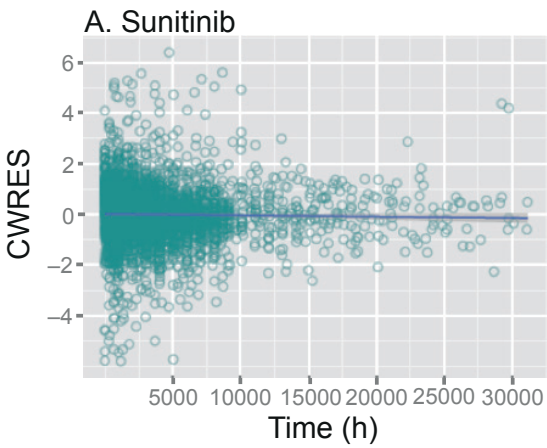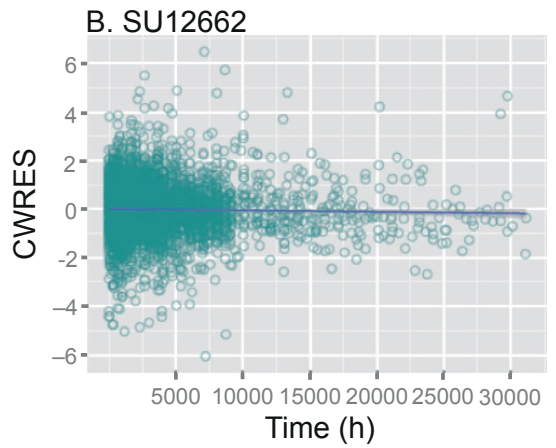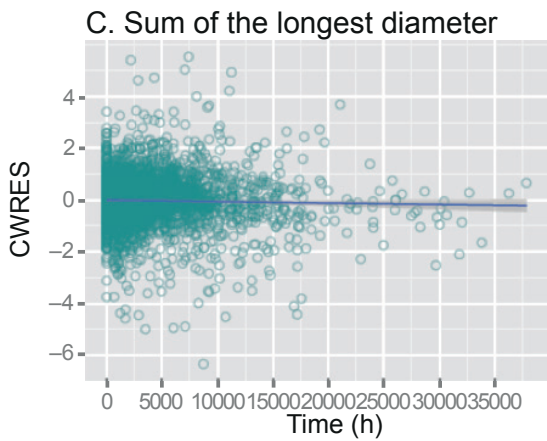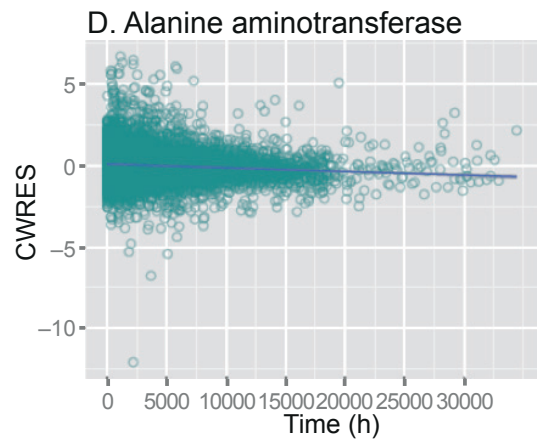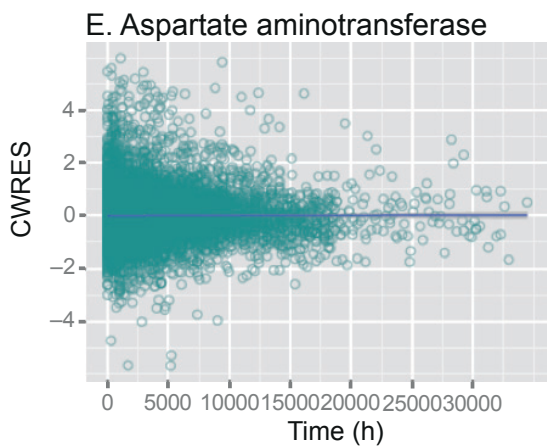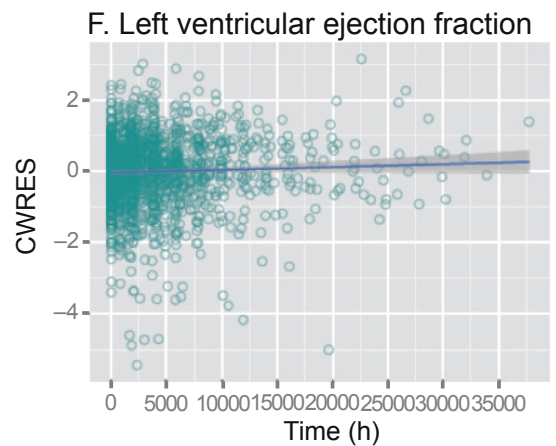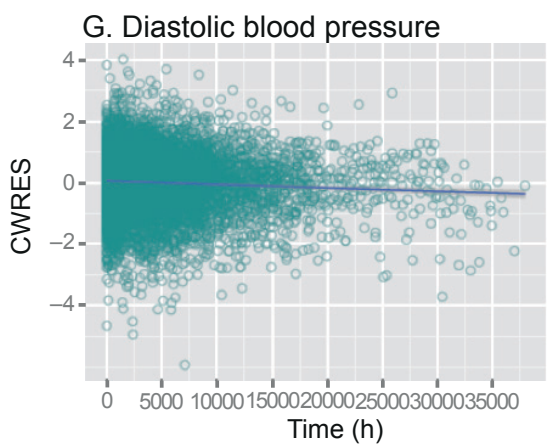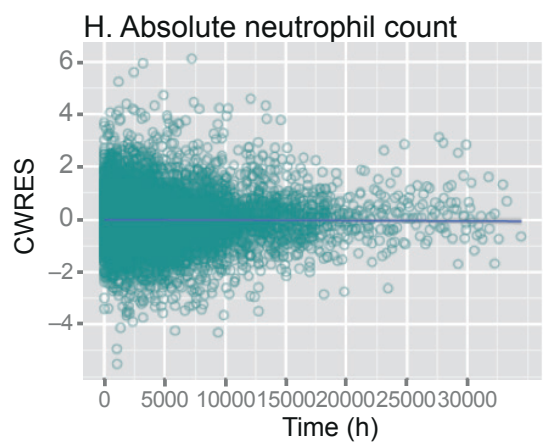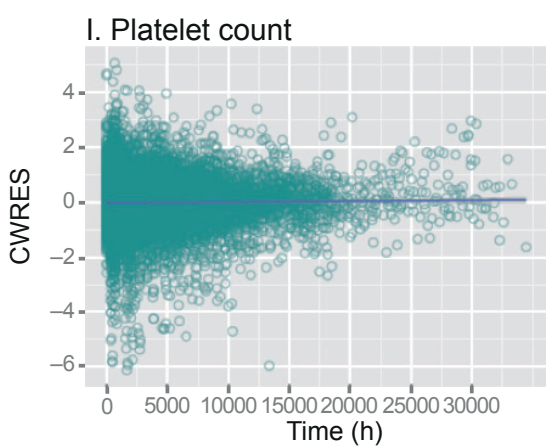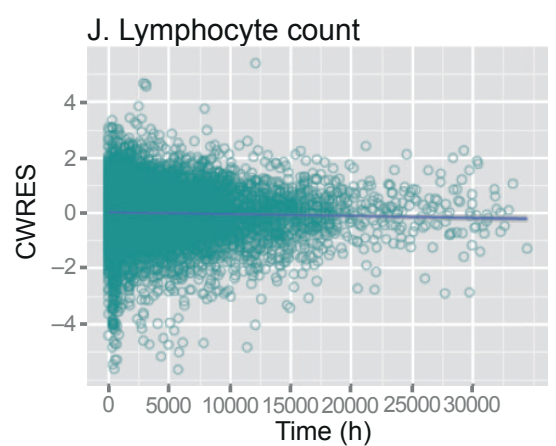

## S2 Goodness-of-Fit Diagnostic Plots, Weighted Residuals vs Predicted (Final Model)

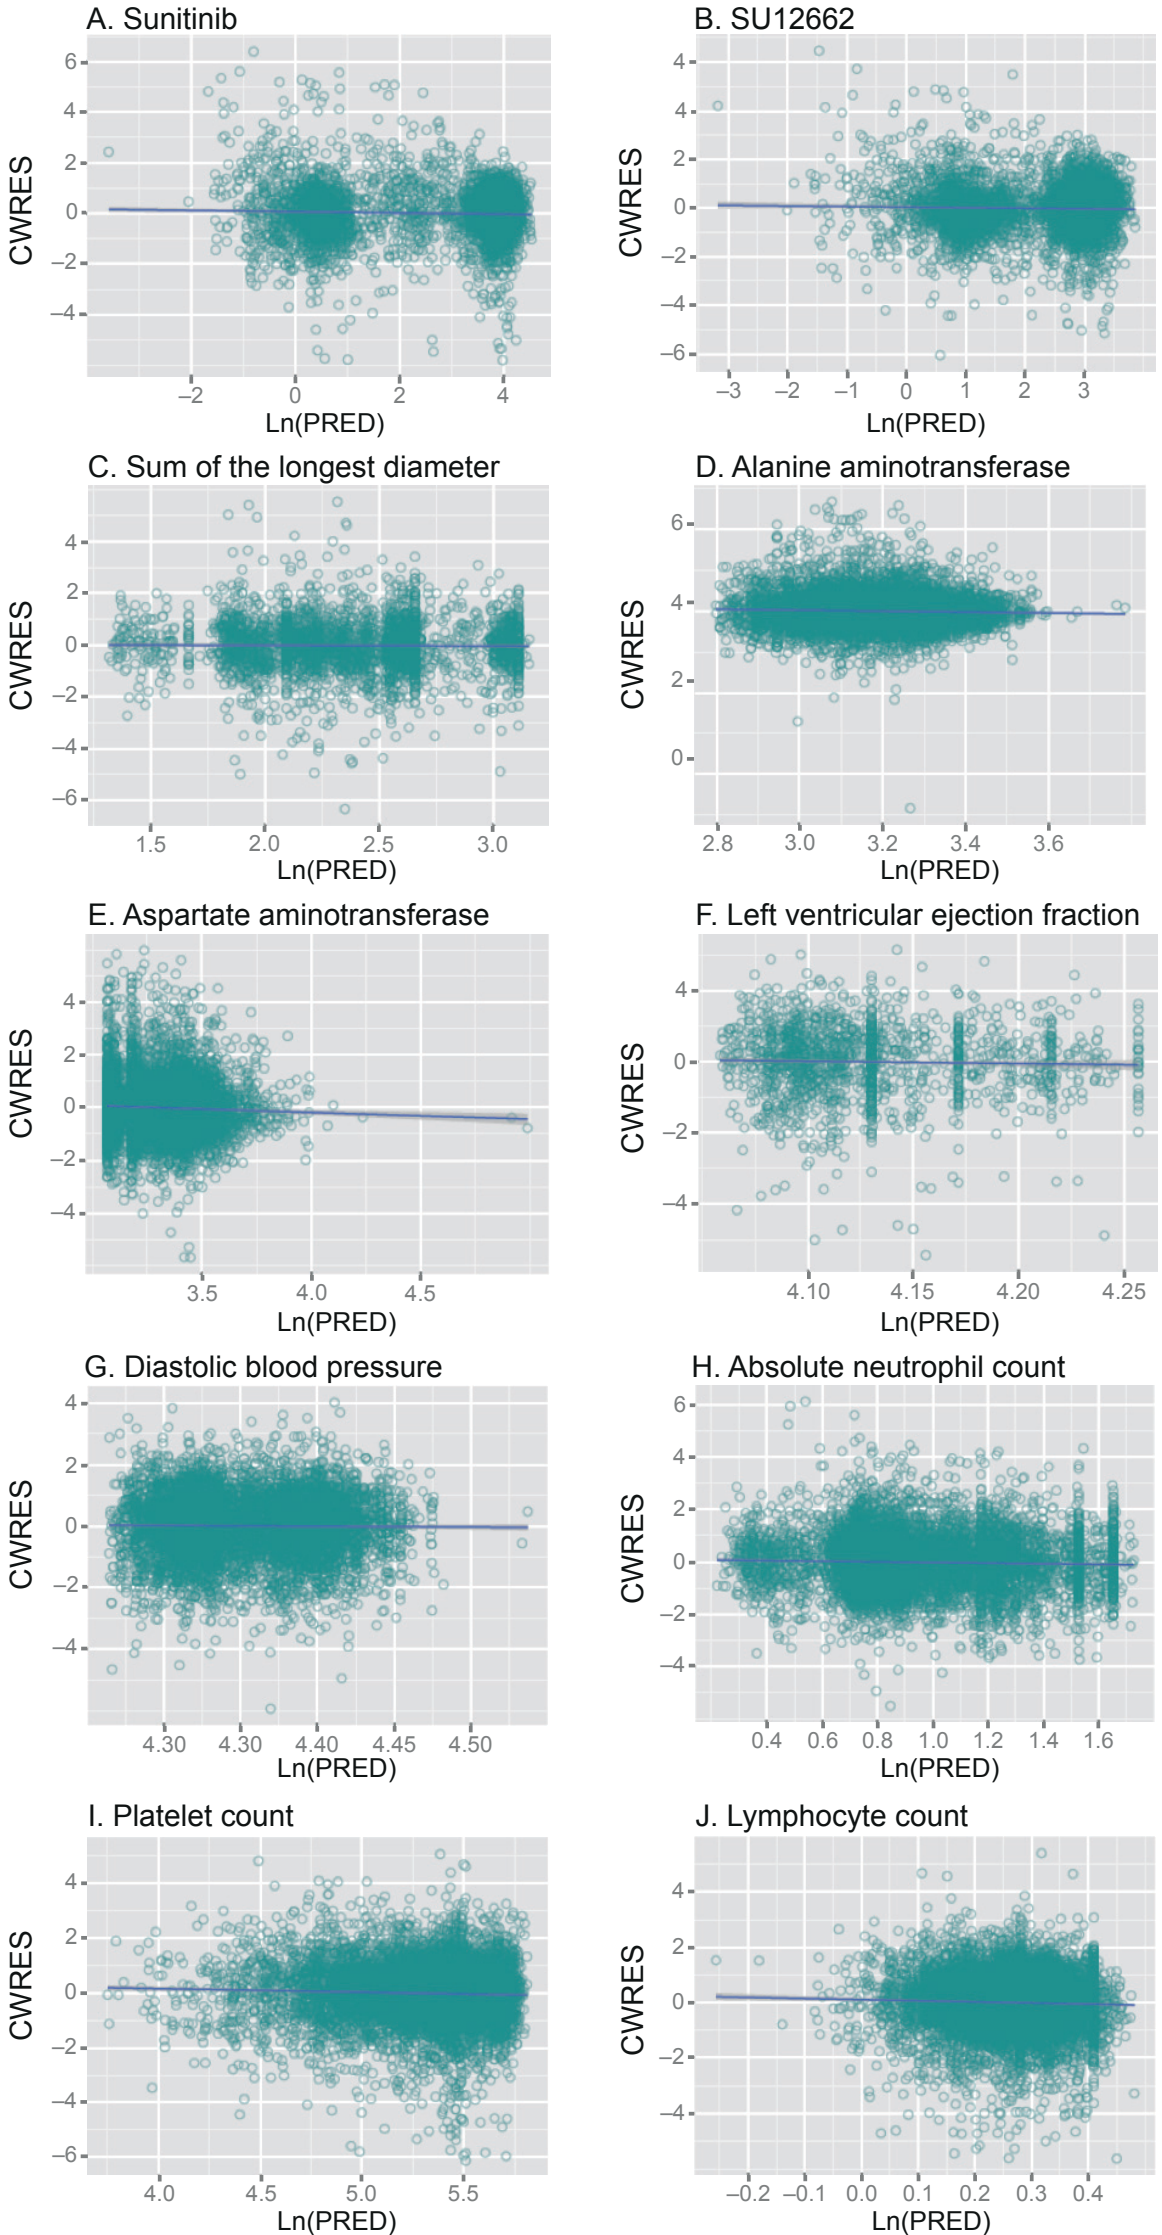

S3 Trial simulations predicted mean PK profiles and median (95% CI) PK parameters during (A, C) cycle 3, following weekly trough PK assessments, and (B, D) the last day of the on-drug period, following PK assessments every 3 h, for sunitinib and SU12662 in GIST patients receiving sunitinib 50 mg/day on Schedule 4/2 or Schedule 2/1.

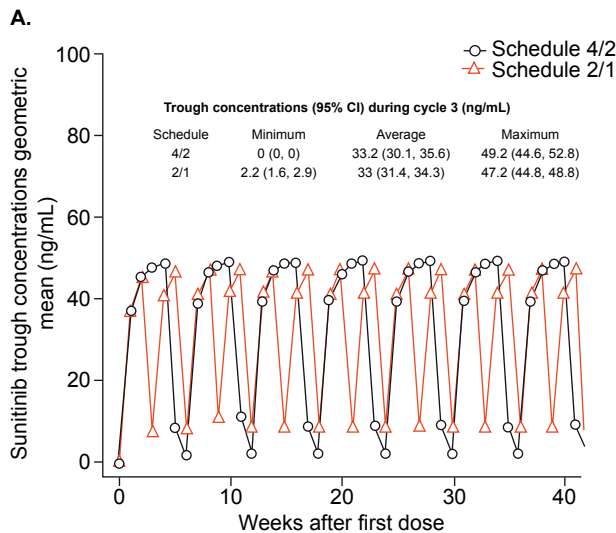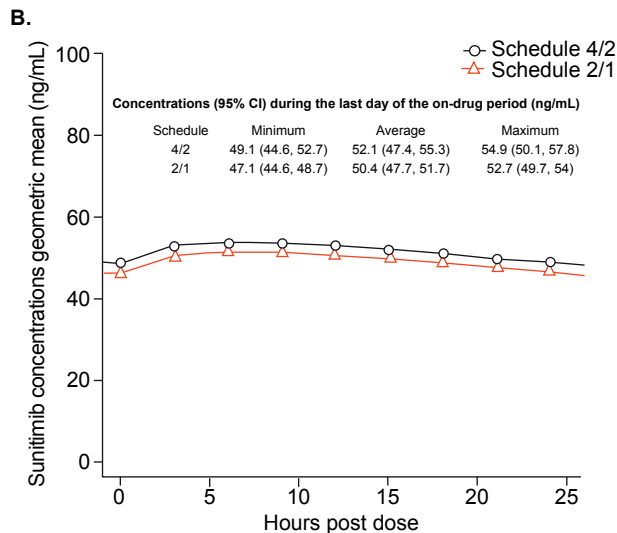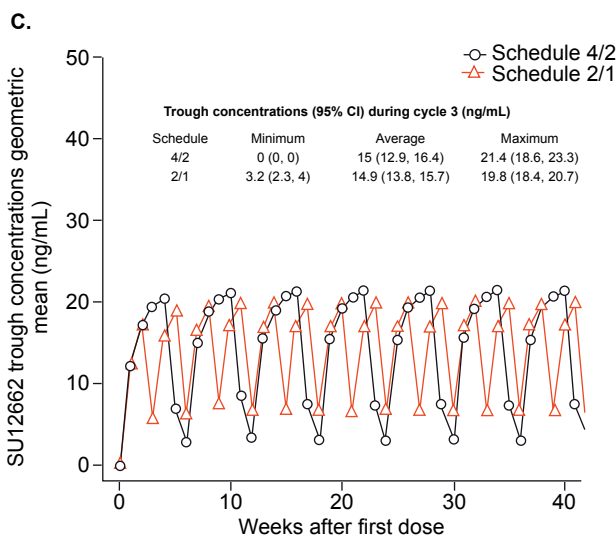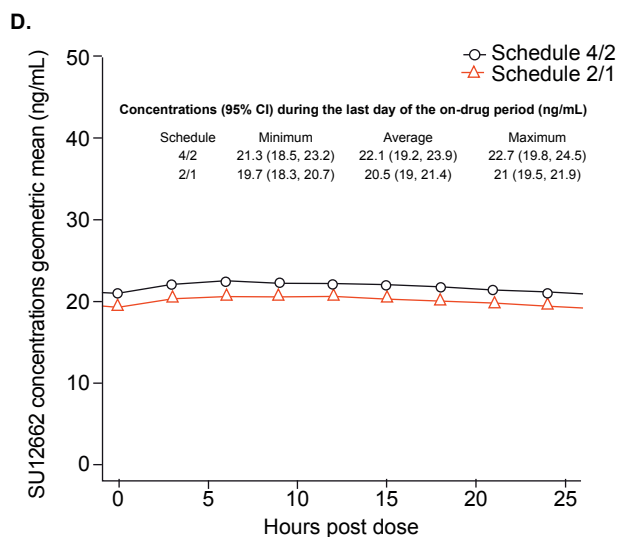

Schedule 4/2: 4-weeks-on followed by 2-weeks-off treatment; Schedule 2/1: 2-weeks-on followed by 1-week-off treatment.

CI = confidence interval; GIST = gastrointestinal stromal tumor; PK = pharmacokinetics.

S4 Trial simulations predicted mean profiles and median (95% CI) values for (A) efficacy and (B–H) safety endpoints in GIST patients receiving sunitinib 50 mg/day on Schedule 4/2 or Schedule 2/1, with corresponding predictions for TTP and ORR and AE incident rates, following assessments made twice every 6 weeks

**A. Sum of longest diameter (SLD)**

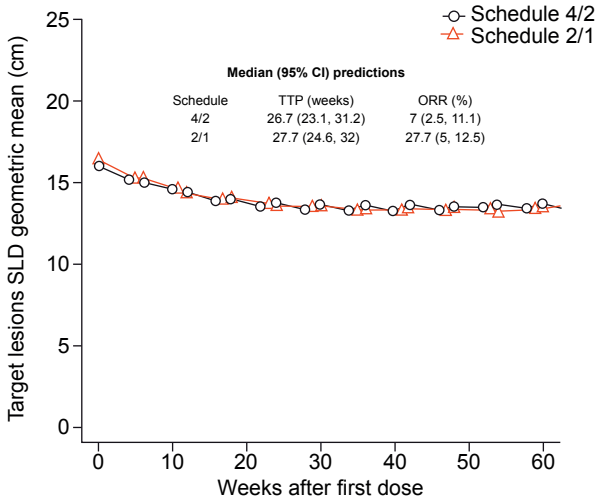

**B. Platelet count**

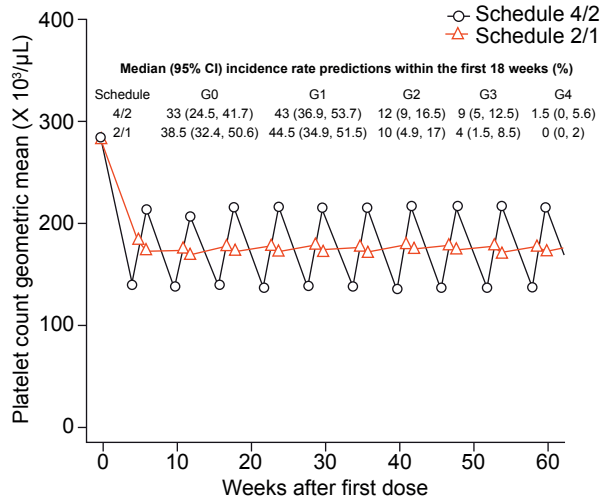

**C. Left ventricular ejection fraction**

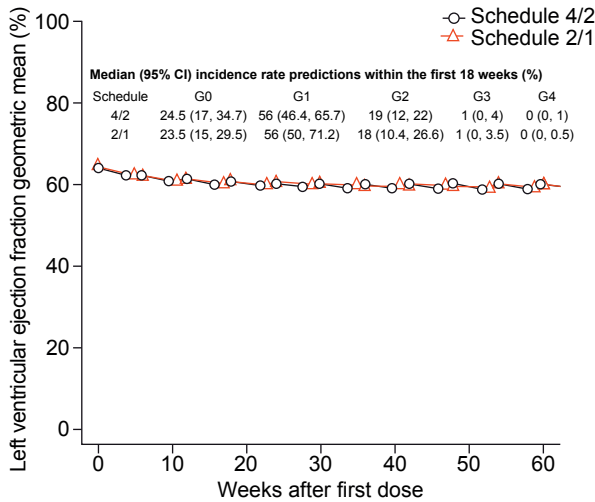

**D. Absolute lymphocyte count**

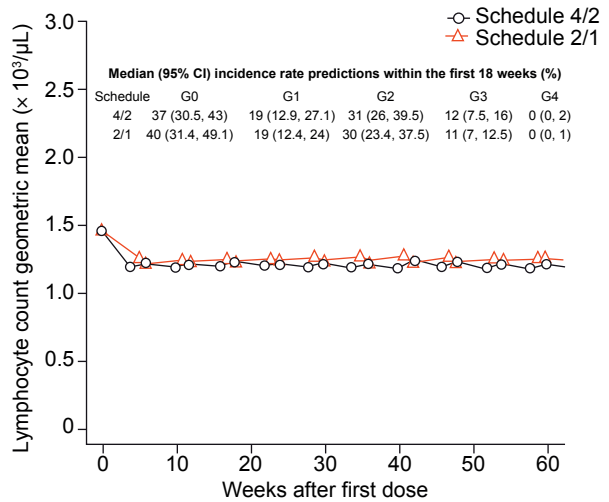

**E. Alanine aminotransferase (ALT)**

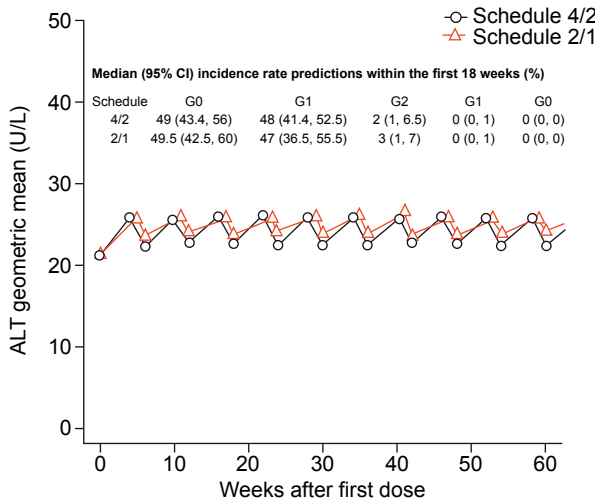

**F. Absolute neutrophil count**

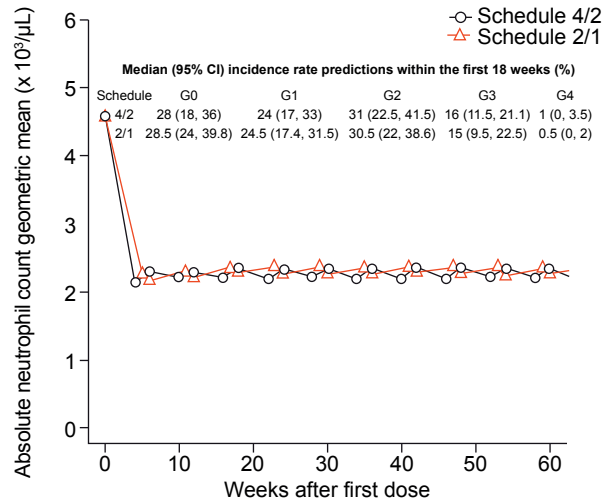

**G. Aspartate aminotransferase (AST)**

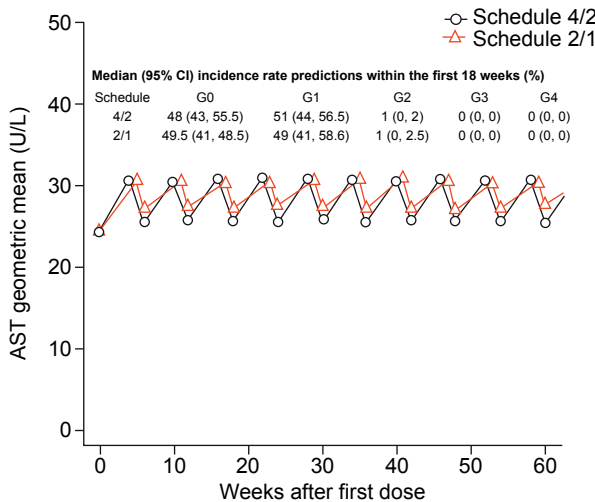

**H. Diastolic blood pressure**

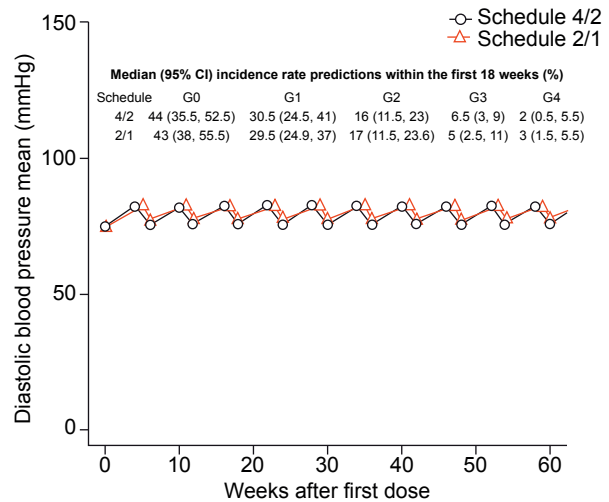

Schedule 4/2: 4-weeks-on followed by 2-weeks-off treatment; Schedule 2/1: 2-weeks-on followed by 1-week-off treatment.  
 AE = adverse event; CI = confidence interval; G = grade of AE intensity; GIST = gastrointestinal stromal tumor;  
 ORR = objective response rate; TTP = time to progression.
